# Supplementary material
Source: PubMed Central journal article supplement (PMC7252168)
Supplement: mmc1.pdf [file mmc1.pdf]

## Supplemental Information

### Association of Blood Glucose Control and Outcomes in Patients with COVID-19 and Pre-existing Type 2 Diabetes

Lihua Zhu, Zhi-Gang She, Xu Cheng, Juan-Juan Qin, Xiao-Jing Zhang, Jingjing Cai, Fang Lei, Haitao Wang, Jing Xie, Wenxin Wang, Haomiao Li, Peng Zhang, Xiaohui Song, Xi Chen, Mei Xiang, Chaozheng Zhang, Liangjie Bai, Da Xiang, Ming-Ming Chen, Yanqiong Liu, Youqin Yan, Mingyu Liu, Weiming Mao, Jinjing Zou, Liming Liu, Guohua Chen, Pengcheng Luo, Bing Xiao, Changjiang Zhang, Zixiong Zhang, Zhigang Lu, Junhai Wang, Haofeng Lu, Xigang Xia, Daihong Wang, Xiaofeng Liao, Gang Peng, Ping Ye, Jun Yang, Yufeng Yuan, Xiaodong Huang, Jiao Guo, Bing-Hong Zhang, and Hongliang Li

## Supplemental Information

### **Association of Blood Glucose Control and Outcomes in Patients with COVID-19 and Pre-existing Type 2 Diabetes**

**Lihua Zhu, Zhi-Gang She, Xu Cheng, Juan-Juan Qin, Xiao-Jing Zhang, Jingjing Cai, Fang Lei, Haitao Wang, Jing Xie, Wenxin Wang, Haomiao Li, Peng Zhang, Xiaohui Song, Xi Chen, Mei Xiang, Chaozheng Zhang, Liangjie Bai, Da Xiang, Ming-Ming Chen, Yanqiong Liu, Youqin Yan, Mingyu Liu, Weiming Mao, Jinjing Zou, Liming Liu, Guohua Chen, Pengcheng Luo, Bing Xiao, Changjiang Zhang, Zixiong Zhang, Zhigang Lu, Junhai Wang, Haofeng Lu, Xigang Xia, Daihong Wang, Xiaofeng Liao, Gang Peng, Ping Ye, Jun Yang, Yufeng Yuan, Xiaodong Huang, Jiao Guo, Bing-Hong Zhang, and Hongliang Li**

## Supplemental Figures:

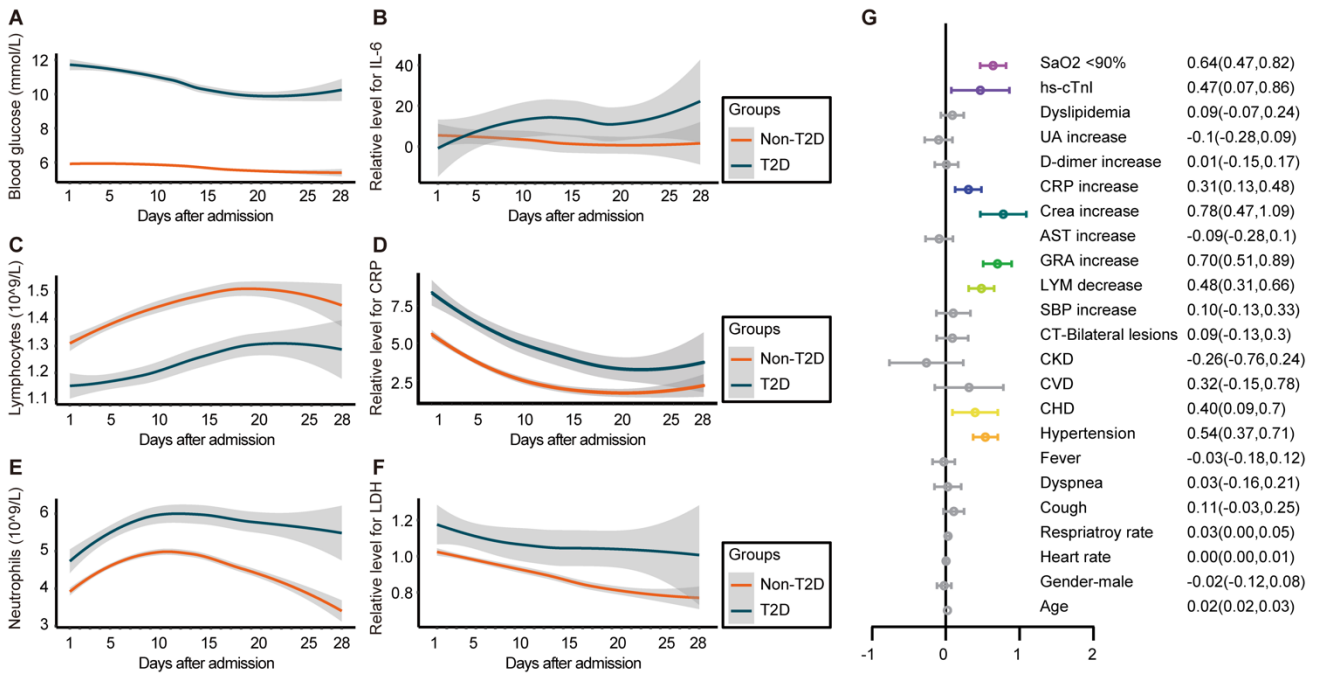

**Figure S1. Dynamics of BG, lymphocyte count, neutrophil count, IL-6, CRP and LDH in T2D and non-T2D groups during hospitalization.**

(A)–(F) Dynamic trajectories of blood glucose, lymphocytes, neutrophils and relative level for IL-6, CRP, LDH during 28-day follow-up duration with 95% confidence interval represented by shaded regions. Comparison between patients with T2D (blue) versus non-T2D patients (orange).

(G) Coefficients of factors related to viral infection or glucose control which affect the median of blood glucose based on generalized linear model. Age, respiratory rate, hypertension, CHD, lymphocyte (LYM) decrease, Neutrophil granulocyte (GRA) increase, Creatinine (CREA) increase, C-reactive protein (CRP) increase, hs-cTnI and SpO<sub>2</sub><90% were positively associated with the median of blood glucose.

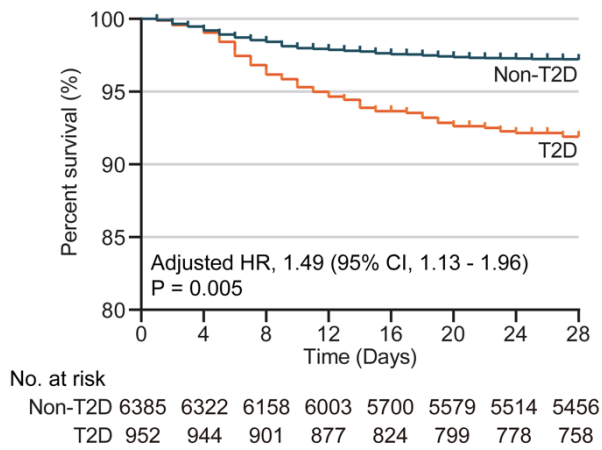

**Figure S2.** Kaplan-Meier Curves for cumulative probability of COVID-19 mortality during 28-day follow-up duration in T2D and non-T2D cohorts. The blips indicate censoring.

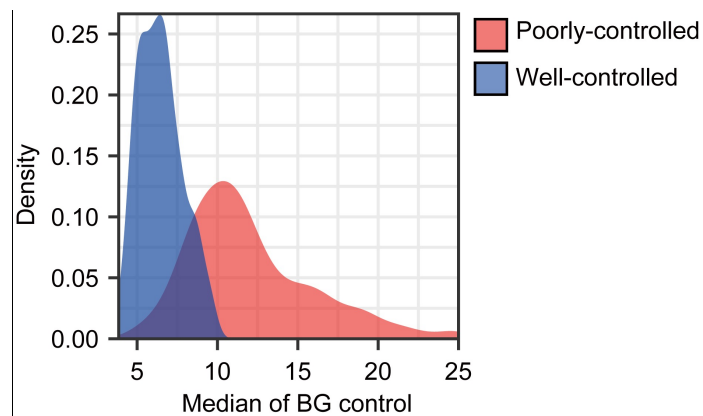

**Figure S3.** Distribution of glycemic variability in the well-controlled BG control group and the poorly-controlled BG control group.

**Table S1. Characteristics of patients with or without T2D on admission.**

| Parameters                                                 | Total (N=7337)     | T2D (n=952)        | Non-T2D(n=6385)    | P value <sup>b</sup> |
|------------------------------------------------------------|--------------------|--------------------|--------------------|----------------------|
| <b>Clinical characteristics</b>                            |                    |                    |                    |                      |
| Age, median(IQR), y                                        | 54 (42-64)         | 62 (55-68)         | 53 (40-63)         | <0.001               |
| Male gender, n (%)                                         | 3477(47.4%)        | 510(53.6%)         | 2967(46.5%)        | <0.001               |
| Female gender, n (%)                                       | 3860(52.6%)        | 442(46.4%)         | 3418(53.5%)        | <0.001               |
| Heart rate, median(IQR), bpm                               | 84.0(78.0-95.0)    | 85.0(77.0-96.8)    | 84.0(78.0-95.0)    | 0.202                |
| Respiratory rate, median(IQR)                              | 20.0(19.0-21.0)    | 20.0(19.0-21.0)    | 20.0(19.0-21.0)    | 0.133                |
| SBP, median(IQR), mmHg                                     | 127.0(120.0-137.0) | 130.0(120.0-142.0) | 126.0(120.0-136.0) | <0.001               |
| DBP, median(IQR), mmHg                                     | 79.0(71.0-86.0)    | 80.0(72.0-86.8)    | 79.0(71.0-85.0)    | 0.025                |
| Days from symptom onset to hospitalization, median(IQR), d | 10.0(6.0-19.0)     | 10.0(6.0-19.0)     | 10.0(6.0-19.0)     | 0.894                |
| Fever, n(%)                                                | 5268(71.8%)        | 671(70.5%)         | 4597(72.0%)        | 0.353                |
| Cough, n(%)                                                | 4656(63.5%)        | 611(64.2%)         | 4045(63.4%)        | 0.646                |
| Fatigue, n(%)                                              | 2369(32.3%)        | 362(38.0%)         | 2007(31.4%)        | <0.001               |
| Dyspnea, n(%)                                              | 1178(16.1%)        | 195(20.5%)         | 983(15.4%)         | <0.001               |
| <b>Comorbidities</b>                                       |                    |                    |                    |                      |
| Hypertension, n(%)                                         | 1763(24.0%)        | 508(53.4%)         | 1255(19.7%)        | <0.001               |
| Coronary heart disease, n(%)                               | 363(5.0%)          | 130(13.7%)         | 233(3.7%)          | <0.001               |
| Chronic liver disease, n(%)                                | 127(1.7%)          | 16(1.7%)           | 111(1.7%)          | 1.000                |
| Cerebrovascular diseases, n(%)                             | 146(2.0%)          | 53(5.6%)           | 93(1.5%)           | <0.001               |
| Chronic kidney disease, n(%)                               | 129(1.8%)          | 47(4.9%)           | 82(1.3%)           | <0.001               |
| COPD, n(%)                                                 | 56(0.8%)           | 12(1.3%)           | 44(0.7%)           | 0.091                |
| <b>Chest CT</b>                                            |                    |                    |                    |                      |
| Unilateral lesion, n/N(%)                                  | 826/6739(12.3%)    | 60/868(6.9%)       | 766/5871(13.1%)    | <0.001               |
| Bilateral lesions, n/N (%)                                 | 5484/6739(81.4%)   | 765/868(88.1%)     | 4719/5871(80.4%)   | <0.001               |
| <b>Laboratory examination</b>                              |                    |                    |                    |                      |
| Leukocyte count > 9.5, 10 <sup>9</sup> /L, n/N (%)         | 464/6407(7.2%)     | 98/870(11.3%)      | 366/5537(6.6%)     | <0.001               |
| Neutrophil count > 6.3, 10 <sup>9</sup> /L, n/N (%)        | 698/6397(10.9%)    | 149/869(17.2%)     | 549/5528(9.9%)     | <0.001               |
| Lymphocyte count < 1.1, 10 <sup>9</sup> /L, n/N (%)        | 2190/6398(34.2%)   | 387/869(44.5%)     | 1803/5529(32.6%)   | <0.001               |
| C-reactive protein increase>ULN <sup>a</sup> , n/N (%)     | 2044/4597(44.5%)   | 365/640(57.0%)     | 1679/3957(42.4%)   | <0.001               |
| Procalcitonin level increase>ULN <sup>a</sup> , n/N (%)    | 1082/4874(22.2%)   | 233/700(33.3%)     | 849/4174(20.3%)    | <0.001               |
| ALT increase> 40 U/L, n/N (%)                              | 1032/6046(17.1%)   | 124/828(15.0%)     | 908/5218(17.4%)    | 0.094                |
| AST increase> 40 U/L, n/N (%)                              | 1019/6047(16.9%)   | 145/827(17.5%)     | 874/5220(16.7%)    | 0.607                |
| Creatinine>ULN <sup>a</sup> , n/N (%)                      | 373/6225(6.0%)     | 103/860(12.0%)     | 270/5365(5.0%)     | <0.001               |
| D-dimer> ULN <sup>a</sup> , n/N (%)                        | 1944/5437(35.8%)   | 390/772(50.5%)     | 1554/4665(33.3%)   | <0.001               |
| K <sup>+</sup> < 3.5 mmol/L, n/N (%)                       | 983/6169(15.9%)    | 133/852(15.6%)     | 850/5317(16.0%)    | 0.820                |
| LDL-c, mmol/L, median (IQR)                                | 2.4(2.0-3.0)       | 2.4(1.9-3.0)       | 2.4(2.0-3.0)       | 0.051                |
| SpO <sub>2</sub> , <95%, n/N (%)                           | 742/5326(13.9%)    | 135/717(18.8%)     | 607/4609(13.2%)    | <0.001               |
| Blood glucose, median (IQR), mmol/L                        | 5.3(4.7-6.7)       | 8.3(6.2-12.4)      | 5.2(4.7-6.1)       | <0.001               |

Abbreviations: SBP, Systolic blood pressure; DBP, Diastolic blood pressure; COPD, Chronic obstructive pulmonary disease; ALT, alanine transaminase; AST, Aspartate transaminase; IQR, Interquartile range.

a, upper limit of normal (ULN) was defined according to criteria in each hospital.

b, The P value was calculated by the Mann-Whitney U test for continuous variables between two groups, Fisher's exact test or  $\chi^2$  test for categorical variables.

**Table S2. In-hospital management of COVID-19 patients with or without T2D on admission**

| Management                                 | Total<br>(N=7337) | T2D<br>(n=952) | Non-T2D<br>(n=6385) | P value <sup>b</sup> |
|--------------------------------------------|-------------------|----------------|---------------------|----------------------|
| Traditional Chinese medicine, n (%)        | 5755(78.4%)       | 745(78.3%)     | 5010(78.5%)         | 0.917                |
| Antiviral drug, n (%)                      | 4874(66.4%)       | 642(67.4%)     | 4232(66.3%)         | 0.504                |
| Antibiotics drug, n (%)                    | 4217(57.5%)       | 584(61.3%)     | 3633(56.9%)         | 0.011                |
| Systemic corticosteroids, n (%)            | 1737(23.7%)       | 280(29.4%)     | 1457(22.8%)         | <0.001               |
| Immunoglobulin, n (%)                      | 1347(18.4%)       | 219(23.0%)     | 1128(17.7%)         | <0.001               |
| Anti-hypertensive drug, n (%)              | 1773(24.2%)       | 429(45.1%)     | 1344(21.1%)         | <0.001               |
| Lipid lowering drug, n (%)                 | 452(6.2%)         | 143(15.0%)     | 309(4.8%)           | <0.001               |
| Vasoactive drug, n (%)                     | 216(2.9%)         | 73(7.7%)       | 143(2.2%)           | <0.001               |
| Antifungal medications, n (%)              | 103(1.4%)         | 24(2.5%)       | 79(1.2%)            | 0.003                |
| Metformin, n (%)                           | 302(4.1%)         | 302(31.7%)     | 0(0.0%)             | <0.001               |
| Sulfonylurea, n (%)                        | 118(1.6%)         | 118(12.4%)     | 0(0.0%)             | <0.001               |
| DPP-4 inhibitor, n (%)                     | 63(0.9%)          | 63(6.6%)       | 0(0.0%)             | <0.001               |
| Insulin, n (%)                             | 384(5.2%)         | 384(40.3%)     | 0(0.0%)             | <0.001               |
| Alpha-glucosidase inhibitor, n (%)         | 378(5.2%)         | 378(39.7%)     | 0(0.0%)             | <0.001               |
| Triazolidinedione, n (%)                   | 14(0.2%)          | 14(1.5%)       | 0(0.0%)             | <0.001               |
| Meglitide                                  | 40(0.6%)          | 40(4.2%)       | 0(0.0%)             | <0.001               |
| Oxygen inhalation, n (%)                   | 4638(63.2%)       | 732(76.9%)     | 3906(61.2%)         | <0.001               |
| Noninvasive ventilation, n (%)             | 345(4.7%)         | 97(10.2%)      | 248(3.9%)           | <0.001               |
| Invasive ventilation, n (%)                | 80(1.1%)          | 34(3.6%)       | 46(0.7%)            | <0.001               |
| Renal replacement therapy, n(%)            | 57(0.8%)          | 19(2.0%)       | 38(0.6%)            | <0.001               |
| Extracorporeal membrane oxygenation, n (%) | 8(0.1%)           | 5(0.5%)        | 3(0.1%)             | 0.001                |

a, Noninvasive ventilation, invasive ventilation, and extracorporeal membrane oxygenation are at mutually exclusive.

b, The P value was calculated by Fisher's exact test or  $\chi^2$  test.

**Table S3. Incidence for primary and secondary outcomes in T2D and non-T2D groups**

| Outcomes                   | Total<br>(N=7337) | T2D<br>(n=952) | Non-T2D<br>(n=6385) | P value <sup>a</sup> |
|----------------------------|-------------------|----------------|---------------------|----------------------|
| All-cause mortality, n (%) | 248(3.4%)         | 74(7.8%)       | 174(2.7%)           | <0.001               |
| Septic shock, n (%)        | 76(1.3%)          | 27(3.8%)       | 49(1.0%)            | <0.001               |
| ARDS, n (%)                | 622(8.5%)         | 161(16.9%)     | 461(7.2%)           | <0.001               |
| DIC, n (%)                 | 18(0.3%)          | 5(0.5%)        | 13(0.2%)            | 0.074                |
| Acute kidney injury, n (%) | 86(1.2%)          | 37(3.9%)       | 49(0.8%)            | <0.001               |
| Acute heart injury, n (%)  | 260(3.5%)         | 69(7.3%)       | 191(3.0%)           | <0.001               |

Abbreviations: ARDS, Acute respiratory distress syndrome; DIC, disseminated intravascular coagulation.

a, The P value was calculated by Fisher's exact test or  $\chi^2$  test.

**Table S4. Hazard Ratio for primary and secondary outcome in T2D and non-T2D groups**

| T2D vs non-T2D      | Unadjusted      |         | Adjusted <sup>a</sup> |                      | Adjusted <sup>b</sup> |                      |
|---------------------|-----------------|---------|-----------------------|----------------------|-----------------------|----------------------|
|                     | HR(95%CI)       | P value | HR(95%CI)             | P value <sup>c</sup> | HR(95%CI)             | P value <sup>c</sup> |
| All-cause mortality | 2.90(2.21,3.81) | <0.001  | 1.70(1.29,2.24)       | <0.001               | 1.49(1.13,1.96)       | 0.005                |
| Septic shock        | 3.66(2.25,5.95) | <0.001  | 2.43(1.48,3.99)       | <0.001               | 1.95(1.18,3.20)       | 0.009                |
| ARDS                | 2.47(2.06,2.95) | <0.001  | 1.71(1.42,2.06)       | <0.001               | 1.44(1.20,1.73)       | <0.001               |
| DIC                 | 2.58(0.92,7.23) | 0.072   | 1.40(0.49,3.94)       | 0.529                | 1.28(0.45,3.64)       | 0.644                |
| Acute kidney injury | 5.11(3.33,7.83) | <0.001  | 3.43(2.21,5.34)       | <0.001               | 3.01(1.94,4.68)       | <0.001               |
| Acute heart injury  | 2.47(1.87,3.25) | <0.001  | 1.53(1.16,2.03)       | 0.003                | 1.32(0.99,1.74)       | 0.055                |

Abbreviations: ARDS, Acute respiratory distress syndrome; DIC, disseminated intravascular coagulation; HR, Hazard ratio; CI, Confidence interval.

a, The adjusted variables included age and gender, hospital sites (as a random effect).

b, The adjusted variables included age, gender, indicators of the severity of COVID-19, hospital sites (as a random effect).

c, The P values were calculated based on Cox proportional hazard model.

**Table S5. Incidence for primary and secondary outcomes of patients in the well-controlled or poorly-controlled BG group.**

| Outcome                    | Total<br>(N=810) | Well-controlled<br>(n=282) | Poorly-controlled<br>(n=528) | P value <sup>a</sup> |
|----------------------------|------------------|----------------------------|------------------------------|----------------------|
| All-cause mortality, n (%) | 61(7.5%)         | 3(1.1%)                    | 58(11.0%)                    | <0.001               |
| Septic shock, n (%)        | 19(3.1)          | 0(0.0%)                    | 19(4.7%)                     | 0.004                |
| ARDS, n (%)                | 133(16.4%)       | 20(7.1%)                   | 113(21.4%)                   | <0.001               |
| DIC, n (%)                 | 3(0.4%)          | 0(0.0%)                    | 3(0.6%)                      | 0.555                |
| Acute kidney injury, n (%) | 22(2.7%)         | 2(0.7%)                    | 20(3.8%)                     | 0.019                |
| Acute heart injury, n (%)  | 56(6.9%)         | 4(1.4%)                    | 52(9.9%)                     | <0.001               |

Abbreviations: ARDS, Acute respiratory distress syndrome; DIC, disseminated intravascular coagulation.

a, The P value was calculated by Fisher's exact test or  $\chi^2$  test.

**Table S6. Hazard Ratio for primary and secondary outcomes of patients in the well-controlled or poorly-controlled BG group.**

| Well-controlled vs. Poorly controlled. | Unadjusted      |                      | Adjusted <sup>a</sup> |                      | Adjusted <sup>b</sup> |                      |
|----------------------------------------|-----------------|----------------------|-----------------------|----------------------|-----------------------|----------------------|
|                                        | HR(95%CI)       | P value <sup>c</sup> | HR(95%CI)             | P value <sup>c</sup> | HR(95%CI)             | P value <sup>c</sup> |
| All-cause mortality                    | 0.09(0.03,0.30) | <0.001               | 0.10(0.03,0.32)       | <0.001               | 0.13(0.04,0.44)       | <0.001               |
| Septic shock                           | -               | -                    | -                     | -                    | -                     | -                    |
| ARDS                                   | 0.31(0.19,0.50) | <0.001               | 0.32(0.20,0.51)       | <0.001               | 0.41(0.25,0.66)       | <0.001               |
| DIC                                    | -               | -                    | -                     | -                    | -                     | -                    |
| Acute kidney injury                    | 0.19(0.04,0.80) | 0.024                | 0.21(0.05,0.88)       | 0.033                | 0.22(0.05,1.03)       | 0.055                |
| Acute heart injury                     | 0.14(0.05,0.39) | <0.001               | 0.15(0.05,0.41)       | <0.001               | 0.21(0.07,0.59)       | 0.003                |

Abbreviations: ARDS, Acute respiratory distress syndrome; DIC, disseminated intravascular coagulation; HR, Hazard ratio; CI, Confidence interval.

a, The adjusted variables included age and gender and hospital sites (as a random effect).

b, The adjusted variables included age, gender, indicators of the severity of COVID-19, comorbidities (hypertension, coronary heart disease, cerebrovascular diseases, chronic liver diseases and chronic renal diseases), and hospital sites (as a random effect).

c, The P values were calculated based on Cox proportional hazard model.

**Table S7. Incidence for primary and secondary outcomes of patients in the well-controlled or poorly-controlled BG group in PSM model.**

| Outcomes                   | Total (N=500) | Well-controlled (n = 250) | Poorly-controlled (n = 250) | P value <sup>a</sup> |
|----------------------------|---------------|---------------------------|-----------------------------|----------------------|
| All-cause mortality, n (%) | 17(3.4%)      | 2(0.8%)                   | 15(6.0%)                    | 0.003                |
| Septic shock, n (%)        | 3(0.8%)       | 0(0.0%)                   | 3(1.7%)                     | 0.119                |
| ARDS, n (%)                | 55(11.0%)     | 18(7.2%)                  | 37(14.8%)                   | 0.010                |
| DIC, n (%)                 | 0(0.0%)       | 0(0.0%)                   | 0(0.0%)                     | 1.000                |
| Acute kidney injury, n (%) | 9(1.8%)       | 1(0.4%)                   | 8(3.2%)                     | 0.037                |
| Acute heart injury, n (%)  | 21(4.2%)      | 4(1.6%)                   | 17(6.8%)                    | 0.007                |

Abbreviations: ARDS, Acute respiratory distress syndrome; DIC, disseminated intravascular coagulation.

a, The P value was calculated by Fisher's exact test or  $\chi^2$  test.



**Table S8. In-hospital management of participants with well-controlled or poorly-controlled BG after PSM**

| Management                                              | Total<br>(N=500) | Well-controlled<br>(n=250) | Poorly-controlled<br>(n=250) | P value <sup>b</sup> |
|---------------------------------------------------------|------------------|----------------------------|------------------------------|----------------------|
| Traditional Chinese medicine, n (%)                     | 409(81.8%)       | 211(84.4%)                 | 198(79.2%)                   | 0.164                |
| Antiviral drug, n (%)                                   | 340(68.0%)       | 160(64.0%)                 | 180(72.0%)                   | 0.069                |
| Antibiotics drug, n (%)                                 | 289(57.8%)       | 139(55.6%)                 | 150(60.0%)                   | 0.365                |
| Systemic corticosteroids, n (%)                         | 126(25.2%)       | 57(22.8%)                  | 69(27.6%)                    | 0.257                |
| Immunoglobulin, n (%)                                   | 95(19.0%)        | 43(17.2%)                  | 52(20.8%)                    | 0.362                |
| Anti-hypertensive drug, n (%)                           | 230(46.0%)       | 111(44.4%)                 | 119(47.6%)                   | 0.530                |
| Lipid lowering drug, n (%)                              | 81(16.2%)        | 35(14.0%)                  | 46(18.4%)                    | 0.225                |
| Metformin, n (%)                                        | 164(32.8%)       | 66(26.4%)                  | 98(39.2%)                    | 0.003                |
| Sulfonylurea, n (%)                                     | 55(11.0%)        | 19(7.6%)                   | 36(14.4%)                    | 0.022                |
| DPP-4 inhibitor, n (%)                                  | 39(7.8%)         | 11(4.4%)                   | 28(11.2%)                    | 0.008                |
| Insulin, n (%)                                          | 172(34.4%)       | 35(14.0%)                  | 137(54.8%)                   | <0.001               |
| Alpha-glucosidase inhibitor, n (%)                      | 194(38.8%)       | 79(31.6%)                  | 115(46.0%)                   | 0.001                |
| Triazolidinedione, n (%)                                | 7(1.4%)          | 2(0.8%)                    | 5(2.0%)                      | 0.450                |
| Meglitide                                               | 18(3.6%)         | 6(2.4%)                    | 12(4.8%)                     | 0.230                |
| Oxygen inhalation, n (%) <sup>a</sup>                   | 389(77.8%)       | 182(72.8%)                 | 207(82.8%)                   | 0.010                |
| Noninvasive ventilation, n (%) <sup>a</sup>             | 33(6.6%)         | 11(4.4%)                   | 22(8.8%)                     | 0.072                |
| Invasive ventilation, n (%) <sup>a</sup>                | 7(1.4%)          | 0(0.0%)                    | 7(2.8%)                      | 0.015                |
| Renal replacement therapy, n(%)                         | 9(1.8%)          | 5(2.0%)                    | 4(1.6%)                      | 1.000                |
| Extracorporeal membrane oxygenation, n (%) <sup>a</sup> | 2(0.4%)          | 0(0.0%)                    | 2(0.8%)                      | 0.499                |

a, Noninvasive ventilation, invasive ventilation, and extracorporeal membrane oxygenation are at mutually exclusive.

b, The P value was calculated by Fisher's exact test or  $\chi^2$  test.

**Table S9. Sensitivity analyses for primary and secondary outcome in well-controlled BG and poorly-controlled groups**

|                          | Sensitivity analyses 1 <sup>a</sup> |                             | Sensitivity analyses 2 <sup>b</sup> |                             |
|--------------------------|-------------------------------------|-----------------------------|-------------------------------------|-----------------------------|
|                          | Adjusted                            |                             | Adjusted                            |                             |
|                          | HR(95%CI)                           | <i>P</i> value <sup>c</sup> | HR(95%CI)                           | <i>P</i> value <sup>c</sup> |
| Satisfied vs Unsatisfied |                                     |                             |                                     |                             |
| All-cause mortality      | 0.17(0.05,0.61)                     | 0.006                       | 0.16(0.05,0.58)                     | 0.005                       |
| Septic shock             | -                                   | -                           | -                                   | -                           |
| ARDS                     | 0.43(0.24,0.78)                     | 0.005                       | 0.39(0.22,0.70)                     | 0.001                       |
| DIC                      | -                                   | -                           | -                                   | -                           |
| Acute kidney injury      | 0.51(0.09,2.78)                     | 0.434                       | 0.52(0.09,2.82)                     | 0.444                       |
| Acute heart injury       | 0.16(0.05,0.56)                     | 0.004                       | 0.15(0.04,0.53)                     | 0.003                       |

a, In the sensitivity analyses, propensity score matched model, age, gender, hospital sites, indicators of the severity of COVID-19, comorbidities (hypertension, coronary heart disease, cerebrovascular disease, and chronic renal diseases), and incidence of increased creatinine were matched.

b, In the sensitivity analyses, propensity score matched model, age, gender, hospital sites, indicators of the severity of COVID-19, comorbidities (hypertension, coronary heart disease, cerebrovascular disease, COPD, chronic liver diseases and chronic renal diseases), and incidence of increased creatinine were matched.

c, The *P* values were calculated based on Cox proportional hazard model.
